# Supplementary material for: Floristic Composition and Diversity of Vascular Plants inRemnant Patches of Arsi-Bale Massif of Oromia RegionalState, Ethiopia
Source: Hindawi journal article supplement (doi:10.1155/2022/6693679), 2022-06-15
Supplement: f1 [file 6693679.f1.zip]

The percentage proportion (B) and species richness (A) of above ground endemic plant species of the study area with respective to their families.

| Family         | Species richness | Family         | Percentage (%) |
|----------------|------------------|----------------|----------------|
| Asteraceae     | 14               | Asteraceae     | 31.82          |
| Lamiaceae      | 4                | Lamiaceae      | 9.09           |
| Asphodelaceae  | 3                | Asphodelaceae  | 6.82           |
| Celastraceae   | 2                | Celastraceae   | 4.55           |
| Crassulaceae   | 2                | Crassulaceae   | 4.55           |
| Lobeliaceae    | 2                | Lobeliaceae    | 4.55           |
| Poaceae        | 2                | Poaceae        | 4.55           |
| Acanthaceae    | 1                | Acanthaceae    | 2.27           |
| Anacardiaceae  | 1                | Anacardiaceae  | 2.27           |
| Asclepiadaceae | 1                | Asclepiadaceae | 2.27           |
| Balsaminaceae  | 1                | Balsaminaceae  | 2.27           |
| Fabaceae       | 1                | Fabaceae       | 2.27           |
| Hypericaceae   | 1                | Hypericaceae   | 2.27           |
| Iridaceae      | 1                | Iridaceae      | 2.27           |
| Menispermaceae | 1                | Menispermaceae | 2.27           |
| Oleaceae       | 1                | Oleaceae       | 2.27           |
| Ranunculaceae  | 1                | Ranunculaceae  | 2.27           |
| Rosaceae       | 1                | Rosaceae       | 2.27           |
| Solanaceae     | 1                | Solanaceae     | 2.27           |
| Tiliaceae      | 1                | Tiliaceae      | 2.27           |
| Urticaceae     | 1                | Urticaceae     | 2.27           |
| Verbenaceae    | 1                | Verbenaceae    | 2.27           |
