# Supplementary material for: Floristic Composition and Diversity of Vascular Plants inRemnant Patches of Arsi-Bale Massif of Oromia RegionalState, Ethiopia
Source: Hindawi journal article supplement (doi:10.1155/2022/6693679), 2022-06-15
Supplement: f1 [file 6693679.f1.zip]

Growth forms of vascular plant species and their percentage proportion in the study area.

| Growth forms | number of species | Growth forms | Percentage (%) |
|--------------|-------------------|--------------|----------------|
| Herb         | 239               | Herb         | 62.57          |
| Shrub        | 82                | Shrub        | 21.47          |
| Tree         | 26                | Tree         | 6.81           |
| Climber      | 18                | Climber      | 4.71           |
| Liana        | 10                | Liana        | 2.62           |
| Tree/Shrub   | 7                 | Tree/Shrub   | 1.83           |
