# Supplementary material for: Floristic Composition and Diversity of Vascular Plants inRemnant Patches of Arsi-Bale Massif of Oromia RegionalState, Ethiopia
Source: Hindawi journal article supplement (doi:10.1155/2022/6693679), 2022-06-15
Supplement: f1 [file 6693679.f1.zip]

Archive with 4 entries (4 files):
- 6693679.f1/Supplematary material for figure 4.pdf
- 6693679.f1/Supplementary material for figure 3.pdf
- 6693679.f1/Supplementary material for figure 5.pdf
- 6693679.f1/Supplementary material for Table 1, 3 and 4.pdf
