# Supplementary material for: Floristic Composition and Diversity of Vascular Plants inRemnant Patches of Arsi-Bale Massif of Oromia RegionalState, Ethiopia
Source: Hindawi journal article supplement (doi:10.1155/2022/6693679), 2022-06-15
Supplement: f1 [file 6693679.f1.zip › 6693679.f1/Supplementary material for figure 3.pdf]

Total number of families, genera and species under different taxa of the study area.

| Groups/Division | Number of families | % proportion | Number of genera | % proportion |
|-----------------|--------------------|--------------|------------------|--------------|
| Angiosperm      | 81                 | 86.2         | 209              | 92.07        |
| Gymnosperm      | 2                  | 2.13         | 2                | 0.88         |
| Pteridopytes    | 11                 | 11.7         | 16               | 7.05         |

| Number of species | % proportion |
|-------------------|--------------|
| 354               | 92.67        |
| 2                 | 0.52         |
| 26                | 6.81         |
