# Supplementary material for: Floristic Composition and Diversity of Vascular Plants inRemnant Patches of Arsi-Bale Massif of Oromia RegionalState, Ethiopia
Source: Hindawi journal article supplement (doi:10.1155/2022/6693679), 2022-06-15
Supplement: f1 [file 6693679.f1.zip › 6693679.f1/Supplementary material for Table 1, 3 and 4.pdf]

List of plant species of the study area (**Key:** T = tree, S = shrub, H = herb, C = climber, L liana).

| Scientific name                                           | Family           | Habit | To Ethiopia |
|-----------------------------------------------------------|------------------|-------|-------------|
| <i>Acacia abyssinica</i> Hochst.                          | Fabaceae         | T     | Indigenous  |
| <i>Acalypha fruticosa</i> Forssk.                         | Euphorbiaceae    | S     | Indigenous  |
| <i>Acanthus sennii</i> Chiov.                             | Acanthaceae      | S     | Endemic     |
| <i>Achyranthes aspera</i> L.                              | Amaranthaceae    | H     | Indigenous  |
| <i>Achyropermum schimperi</i> (Hochst. ex Briq.) Perkins. | Lamiaceae        | S     | Indigenous  |
| <i>Acmella caulirhiza</i> Del.                            | Asteraceae       | H     | Indigenous  |
| <i>Acokanthera schimperi</i> (A. DC.) Schweinf.           | Apocynaceae      | T     | Indigenous  |
| <i>Adiantum capillus-veneris</i> L.                       | Adiantaceae      | H     | Indigenous  |
| <i>Agave americana</i> L.                                 | Agavaceae        | S     | Indigenous  |
| <i>Agrocharis incognita</i> (Norman) Heyw. & Jury         | Apiaceae         | H     | Indigenous  |
| <i>Agrocharis melanantha</i> Hochst.                      | Apiaceae         | H     | Indigenous  |
| <i>Ajuga integrifolia</i> Buch-Ham. ex D. Don             | Lamiaceae        | H     | Indigenous  |
| <i>Alchemilla abyssinica</i> Fresen.                      | Rosaceae         | H     | Indigenous  |
| <i>Alchemilla ellenbeckii</i> Engl.                       | Rosaceae         | H     | Indigenous  |
| <i>Alchemilla haumannii</i> Rothm.                        | Rosaceae         | H     | Endemic     |
| <i>Alchemilla pedata</i> A. Rich.                         | Rosaceae         | H     | Indigenous  |
| <i>Allophylus abyssinicus</i> (Hochst.) Radlk.            | Sapindaceae      | T     | Indigenous  |
| <i>Amaranthus hybridus</i> L.                             | Amaranthaceae    | H     | Indigenous  |
| <i>Amauropelta bergiana</i> (Schltdl.) Holtum             | Thelypteridaceae | H     | Indigenous  |
| <i>Anagallis arvensis</i> L.                              | Primulaceae      | H     | Indigenous  |
| <i>Andropogon abyssinicus</i> Fresen.                     | Poaceae          | H     | Indigenous  |
| <i>Andropogon amethystinus</i> Steud.                     | Poaceae          | H     | Indigenous  |
| <i>Andropogon schirensis</i> Hochst. ex A. Rich.          | Poaceae          | H     | Indigenous  |
| <i>Anthemis tigrensensis</i> J. Gay ex A. Rich.           | Asteraceae       | H     | Indigenous  |
| <i>Apodytes dimidiata</i> E. Mey. ex Arn.                 | Icacinales       | T     | Indigenous  |
| <i>Arenaria leptoclados</i> (Reichb.) Guss.               | Caryophyllaceae  | H     | Indigenous  |
| <i>Arisaema schimperianum</i> Schott                      | Araceae          | H     | Indigenous  |
| <i>Artemisia abyssinica</i> Sch. Bip. ex A. Rich.         | Asteraceae       | H     | Indigenous  |
| <i>Arthropteris monocarpa</i> (Cordem.) C. Chr.           | Oleandraceae     | H     | Indigenous  |
| <i>Arundinaria alpina</i> K. Schum.                       | Poaceae          | S     | Indigenous  |
| <i>Asparagus africanus</i> Lam.                           | Asparagaceae     | Liana | Indigenous  |
| <i>Asparagus racemosus</i> Willd.                         | Asparagaceae     | Liana | Indigenous  |
| <i>Aspidotis schimperi</i> (Kunze) Pic. Serm.             | Sinopteridaceae  | H     | Indigenous  |
| <i>Asplenium abyssinicum</i> Fee                          | Aspleniaceae     | H     | Indigenous  |
| <i>Asplenium aethiopicum</i> (Burm. f.) Bech.             | Aspleniaceae     | H     | Indigenous  |
| <i>Asplenium buettneri</i> Hieron. ex Brause              | Aspleniaceae     | H     | Indigenous  |
| <i>Asplenium erectum</i> Bory de Saint-Vincent            | Aspleniaceae     | H     | Indigenous  |
| <i>Asplenium formosum</i> Willd.                          | Aspleniaceae     | H     | Indigenous  |
| <i>Asplenium theciferum</i> (HBK.) Mett.                  | Aspleniaceae     | H     | Indigenous  |
| <i>Asplenium trichomanes</i> L.                           | Aspleniaceae     | H     | Indigenous  |
| <i>Asplenium uhligeri</i> Hieron.                         | Aspleniaceae     | H     | Indigenous  |
| <i>Avena sativa</i> L.                                    | Poaceae          | H     | Indigenous  |
| <i>Bartsia longiflora</i> Hochst. ex Benth.               | Scrophulariaceae | S     | Indigenous  |
| <i>Bartsia trixago</i> L.                                 | Scrophulariaceae | H     | Indigenous  |
| <i>Bersama abyssinica</i> Fresen.                         | Melastomataceae  | S     | Indigenous  |
| <i>Bidens camporum</i> (Hutch.) Mesfin                    | Asteraceae       | H     | Indigenous  |
| <i>Bidens macroptera</i> (Sch. Bip. ex Chiov.) Mesfin.    | Asteraceae       | H     | Endemic     |
| <i>Bidens microphylla</i> Sherff.                         | Asteraceae       | H     | Indigenous  |
| <i>Bidens pilosa</i> L.                                   | Asteraceae       | H     | Indigenous  |
| <i>Bidens rupestris</i> (Sch. Bip.) Sherff.               | Asteraceae       | H     | Indigenous  |
| <i>Bidens schimperi</i> Sch. Bip. ex Walp.                | Asteraceae       | H     | Indigenous  |
| <i>Bidens ternata</i> (Chiov.) Sherff                     | Asteraceae       | H     | Indigenous  |

|                                                                    |                 |       |            |
|--------------------------------------------------------------------|-----------------|-------|------------|
| <i>Bothriocline schimperi</i> Oliv. & Hiern ex Benth.              | Asteraceae      | S     | Endemic    |
| <i>Brachiaria brizantha</i> (A. Rich.) Stapf                       | Poaceae         | H     | Indigenous |
| <i>Bromus pectinatus</i> Thunb.                                    | Poaceae         | H     | Indigenous |
| <i>Brucea antidysenterica</i> J. F. Mill.                          | Simaroubaceae   | S     | Indigenous |
| <i>Buddleja davidii</i> Franch.                                    | Loganiaceae     | S     | Introduced |
| <i>Buddleja polystachya</i> Fresen.                                | Loganiaceae     | S     | Indigenous |
| <i>Calpurnia aurea</i> (Ait.) Benth.                               | Fabaceae        | S     | Indigenous |
| <i>Canthium oligocarpum</i> Hiern subsp. <i>Oligocarpum</i>        | Rubiaceae       | S     | Indigenous |
| <i>Capsella bursa-pastoris</i> (L.) Medic.                         | Brassicaceae    | H     | Indigenous |
| <i>Carduus schimperi</i> Sch. Bip. ex. A. Rich.                    | Asteraceae      | H     | Indigenous |
| <i>Carduus nyassanus</i> (S. Moore) R. E. Fr.                      | Asteraceae      | H     | Indigenous |
| <i>Carex acutiformis</i> Ehrh.                                     | Cyperaceae      | H     | Indigenous |
| <i>Carex conferta</i> Hochst. ex A. Rich.                          | Cyperaceae      | H     | Indigenous |
| <i>Carex monostachya</i> A. Rich.                                  | Cyperaceae      | H     | Indigenous |
| <i>Carex peregrina</i> Link                                        | Cyperaceae      | H     | Indigenous |
| <i>Carex petitiana</i> A. Rich                                     | Cyperaceae      | H     | Indigenous |
| <i>Carex simensis</i> hochst. ex A. Rich.                          | Cyperaceae      | H     | Indigenous |
| <i>Carex steudneri</i> Bock.                                       | Cyperaceae      | H     | Indigenous |
| <i>Carissa spinarum</i> L.                                         | Apocynaceae     | S     | Indigenous |
| <i>Carthamus lanatus</i> L.                                        | Asteraceae      | S     | Indigenous |
| <i>Cassipourea malosana</i> (Baker) Alston.                        | Rhizophoraceae  | S     | Indigenous |
| <i>Celtis africana</i> Burm.                                       | Ulmaceae        | S     | Indigenous |
| <i>Centella asiatica</i> (L.) Urban                                | Apiaceae        | H     | Indigenous |
| <i>Cheilanthes coriacea</i> Decne.                                 | Sinopteridaceae | H     | Indigenous |
| <i>Cheilanthes farinosa</i> (Forssk.) Kaulf.                       | Sinopteridaceae | H     | Indigenous |
| <i>Cheilanthes multifida</i> (Sw.) Sw.                             | Sinopteridaceae | H     | Indigenous |
| <i>Chenopodium murale</i> L.                                       | Chenopodiaceae  | H     | Indigenous |
| <i>Chionanthus mildbraedii</i> (Gilg & Schellenb.) Stearn          | Oleaceae        | T/S   | Indigenous |
| <i>Cicer arietinum</i> L.                                          | Fabaceae        | H     | Introduced |
| <i>Cineraria deltoidea</i> Sond.                                   | Asteraceae      | H     | Indigenous |
| <i>Cineraria sebalatii</i> Cufod.                                  | Asteraceae      | H     | Endemic    |
| <i>Cirsium schimperi</i> (Vatke) C. Jeffrey ex Cufod.              | Asteraceae      | H     | Endemic    |
| <i>Cirsium vulgare</i> (Savi.) Ten.                                | Asteraceae      | H     | Introduced |
| <i>Cissampelos pareira</i> L.                                      | Menispermaceae  | C     | Endemic    |
| <i>Clematis hirsuta</i> Perr. & Guill                              | Ranunculaceae   | Liana | Endemic    |
| <i>Clematis simensis</i> Fresen.                                   | Ranunculaceae   | Liana | Indigenous |
| <i>Clerodendrum myricoides</i> (Hochst.) Vatke.                    | Lamiaceae       | S     | Indigenous |
| <i>Clutia abyssinica</i> Jaub. & Spach.                            | Euphorbiaceae   | S     | Indigenous |
| <i>Clutia lanceolata</i> Forssk.                                   | Euphorbiaceae   | S     | Indigenous |
| <i>Colpodium hedbergii</i> (Meld.) Tzvel.                          | Poaceae         | H     | Indigenous |
| <i>Colutea abyssinica</i> Kunth & Bouch                            | Fabaceae        | S     | Indigenous |
| <i>Commelina africana</i> L.                                       | Commelinaceae   | H     | Indigenous |
| <i>Commelina benghalensis</i> L.                                   | Commelinaceae   | H     | Indigenous |
| <i>Conyza stricta</i> Willd.                                       | Asteraceae      | H     | Indigenous |
| <i>Conyza tigrensensis</i> Oliv. & Hiern                           | Asteraceae      | H     | Indigenous |
| <i>Cordia africana</i> Lam.                                        | Boraginaceae    | T     | Indigenous |
| <i>Cotula abyssinica</i> Sch. Bip. ex A. Rich.                     | Asteraceae      | H     | Indigenous |
| <i>Crassocephalum macropappum</i> (Sch. Bip. ex A. Rich.) S. Moore | Asteraceae      | H     | Endemic    |
| <i>Crassocephalum rubens</i> (Juss. ex Jacq.) S. Moore             | Asteraceae      | H     | Indigenous |
| <i>Crassula schimperi</i> Fisch. & Mey.                            | Crassulaceae    | H     | Indigenous |
| <i>Crassula vaginata</i> Eckl. & Zeyl.                             | Crassulaceae    | H     | Indigenous |
| <i>Crepis foetida</i> L.                                           | Asteraceae      | H     | Indigenous |
| <i>Crepis rueppellii</i> Sch. Bip.                                 | Asteraceae      | H     | Indigenous |
| <i>Crotalaria plowdenii</i> Bak.                                   | Fabaceae        | H     | Indigenous |

|                                                                                |                 |       |            |
|--------------------------------------------------------------------------------|-----------------|-------|------------|
| <i>Crotalaria rosenii</i> (Pax) Milne-Redh. ex Polhill                         | Fabaceae        | H     | Endemic    |
| <i>Croton macrostachyus</i> Pax                                                | Euphorbiaceae   | T     | Indigenous |
| <i>Ctenitis cirrhosa</i> (Schumach.) Ching                                     | Tectariaceae    | ???   | Indigenous |
| <i>Cyanotis barbata</i> D. Don                                                 | Commelinaceae   | H     | Indigenous |
| <i>Cyathula cylindrica</i> Maq.                                                | Amaranthaceae   | H     | Indigenous |
| <i>Cynodon dactylon</i> (L.) Pers.                                             | Poaceae         | H     | Indigenous |
| <i>Cynoglossum amplifolium</i> Hochst. Ex A. DC                                | Boraginaceae    | H     | Indigenous |
| <i>Cynoglossum coeruleum</i> Hochst. ex A. DO. In De.                          | Boraginaceae    | H     | Indigenous |
| <i>Cynoglossum lanceolatum</i> Forssk.                                         | Boraginaceae    | H     | Indigenous |
| <i>Cyperus assimilis</i> Steud.                                                | Cyperaceae      | H     | Indigenous |
| <i>Cyperus dives</i> Del.                                                      | Cyperaceae      | H     | Indigenous |
| <i>Cyperus fischerianus</i> A. Rich.                                           | Cyperaceae      | H     | Indigenous |
| <i>Cyperus impubes</i> Steud.                                                  | Cyperaceae      | H     | Indigenous |
| <i>Cyperus sesquiflorus</i> (Torr.) Mattf. & Kuk. Subsp. <i>Appendiculatus</i> | Cyperaceae      | H     | Indigenous |
| <i>Delphinium wellbyi</i> Hemsl.                                               | Ranunculaceae   | H     | Indigenous |
| <i>Desmodium intortum</i> (Mill.) Urb.                                         | Fabaceae        | H     | NA         |
| <i>Desmodium repandum</i> (Vahl) DC.                                           | Fabaceae        | H     | Introduced |
| <i>Dicranopteris linearis</i> (Burm. f.) Underw.                               | Gleicheniaceae  | H     | Indigenous |
| <i>Dicrocephala chrysanthemifolia</i> (Be.) DC.                                | Asteraceae      | H     | Indigenous |
| <i>Dicrocephala integrifolia</i> (L. f.) Kuntza                                | Asteraceae      | H     | Indigenous |
| <i>Digitaria velutina</i> (Forssk.) P. Beauv.                                  | Poaceae         | H     | Indigenous |
| <i>Dipsacus pinnatifidus</i> Steud. Ex A. Rich.                                | Dipsacaceae     | H     | Indigenous |
| <i>Discopodium penninervium</i> Hochst.                                        | Solanaceae      | S     | Indigenous |
| <i>Dombeya torrida</i> (T. F. Gmel.) P. Bamps                                  | Sterculiaceae   | T     | Indigenous |
| <i>Dovyalis abyssinica</i> (A. Rich.) Warb.                                    | Flacourtiaceae  | S     | Indigenous |
| <i>Dovyalis verrucosa</i> (Hochst.) Warb.                                      | Flacourtiaceae  | S     | Indigenous |
| <i>Dregea abyssinica</i> (Hochst.) K. Schum.                                   | Asclepiadaceae  | Liana | Indigenous |
| <i>Dregea rubicunda</i> K. Schum.                                              | Asclepiadaceae  | Liana | Indigenous |
| <i>Droguetia iners</i> (Forssk.) Schweinf.                                     | Urticaceae      | H     | Indigenous |
| <i>Drynaria volkensii</i> Hieron.                                              | Polypodiaceae   | H     | Indigenous |
| <i>Dryopteris schimperiana</i> (Hochst. ex A. Br.) C. Chr.                     | Dryopteridaceae | H     | Indigenous |
| <i>Echinops angustilobus</i> S. Moore                                          | Asteraceae      | H     | Indigenous |
| <i>Echinops ellenbeckii</i> O. Hoffm.                                          | Asteraceae      | S     | Endemic    |
| <i>Echinops hispidus</i> Fresen.                                               | Asteraceae      | H     | Indigenous |
| <i>Echinops longisetus</i> A. Rich.                                            | Asteraceae      | S     | Endemic    |
| <i>Ekebergia capensis</i> Sparrm.                                              | Meliaceae       | T     | Indigenous |
| <i>Eleusine floccifolia</i> (Forssk.) Spreng.                                  | Poaceae         | H     | Indigenous |
| <i>Embelia schimperi</i> Vatke                                                 | Myrsinaceae     | Liana | Indigenous |
| <i>Epilobium hirsutum</i> L.                                                   | Onagraceae      | H     | Indigenous |
| <i>Eragrostis ciliensis</i> (All.) Vign.ex Janchen.                            | Poaceae         | H     | Indigenous |
| <i>Eragrostis paniciformis</i> (A. Br.) Steud.                                 | Poaceae         | H     | Indigenous |
| <i>Erica arborea</i> L.                                                        | Ericaceae       | S/T   | Indigenous |
| <i>Erica tenuipilosa</i> (Engl. ex Alm & Fries                                 | Ericaceae       | S     | Indigenous |
| <i>Erica trimera</i> (Engl.) Beentje                                           | Ericaceae       | S/T   | Indigenous |
| <i>Erucastrum arabicum</i> Fisch. & Mey.                                       | Brassicaceae    | H     | Indigenous |
| <i>Erythrina brucei</i> Schweinf.                                              | Fabaceae        | T     | Endemic    |
| <i>Eucalyptus camaldulensis</i> Dehnh.                                         | Myrtaceae       | T     | Introduced |
| <i>Eucalyptus globulus</i> Labill                                              | Myrtaceae       | T     | Introduced |
| <i>Euphorbia abyssinica</i> Gmel                                               | Euphorbiaceae   | T     | Indigenous |
| <i>Euphorbia schimperiana</i> Scheele                                          | Euphorbiaceae   | H     | Indigenous |
| <i>Festuca abyssinica</i> Hochst. ex A. Rich.                                  | Poaceae         | H     | Indigenous |
| <i>Festuca macrophylla</i> Hochst. ex A. Rich.                                 | Poaceae         | H     | Endemic    |
| <i>Festuca simensis</i> Hochst ex. A. Rich.                                    | Poaceae         | H     | Indigenous |
| <i>Ficus sycomorus</i> L.                                                      | Moraceae        | T     | Indigenous |

|                                                              |                  |     |            |
|--------------------------------------------------------------|------------------|-----|------------|
| <i>Ficus vasta</i> Forssk.                                   | Moraceae         | T   | Indigenous |
| <i>Flacourtia indica</i> (Burm.f) Merr.                      | Flacourtiaceae   | S   | Indigenous |
| <i>Galiniera saxifraga</i> (Hochst.) Bridson                 | Lamiaceae        | S   | Indigenous |
| <i>Galinsoga parviflora</i> Cav.                             | Asteraceae       | H   | Introduced |
| <i>Galium aparinoides</i> Forssk.                            | Rubiaceae        | C   | Indigenous |
| <i>Galium simense</i> Fresen.                                | Rubiaceae        | C   | Indigenous |
| <i>Geranium arabicum</i> Forssk.                             | Geraniaceae      | H   | Indigenous |
| <i>Geranium ocellatum</i> Cambess.                           | Geraniaceae      | H   | Indigenous |
| <i>Gerbera piloselloides</i> (L.) Case.                      | Asteraceae       | H   | Indigenous |
| <i>Gladiolus longispithaceus</i> Cufod.                      | Iridaceae        | H   | Endemic    |
| <i>Gnaphalium rubriflorum</i> Hilliard.                      | Asteraceae       | H   | Indigenous |
| <i>Gnidia glauca</i> (Fresen.) Gilg                          | Thymelaeaceae    | S   | Indigenous |
| <i>Gomphocarpus purpurascens</i> A. Rich.                    | Asclepiadaceae   | H   | Endemic    |
| <i>Grewia ferruginea</i> Hochst. ex A. Rich.                 | Tiliaceae        | S   | Indigenous |
| <i>Guizotia scabra</i> (Vis.) Chiov.                         | Asteraceae       | H   | Indigenous |
| <i>Habenaria montolivaea</i> Kraenzl.ex Engl.                | Orchidaceae      | H   | Indigenous |
| <i>Habenaria petitiata</i> (A. Rich.) Th. Dur. & Schinz      | Orchidaceae      | H   | Indigenous |
| <i>Hagenia abyssinica</i> (Bruce) J.F. Gmelin                | Rosaceae         | T   | Indigenous |
| <i>Halleria lucida</i> L.                                    | Scrophulariaceae | S   | Indigenous |
| <i>Haplocarpha rueppellii</i> (Sch. Bip.) Beauv.             | Asteraceae       | H   | Indigenous |
| <i>Haplocarpha schimperii</i> (Sch. Bip.) Beauv.             | Asteraceae       | H   | Indigenous |
| <i>Hebenstretia angolensis</i> Rolfe                         | Scrophulariaceae | H   | Indigenous |
| <i>Helichrysum citrispinum</i> Del.                          | Asteraceae       | S   | Indigenous |
| <i>Helichrysum foetidum</i> (L.) Moench.                     | Asteraceae       | H   | Indigenous |
| <i>Helichrysum formosissimum</i> Sch. Bid ex A. Rich.        | Asteraceae       | H   | Indigenous |
| <i>Helichrysum forsskahlii</i> (J. F. Gmel.) Hilliard & Burt | Asteraceae       | H   | Indigenous |
| <i>Helichrysum gofense</i> Cufod.                            | Asteraceae       | H   | Endemic    |
| <i>Helichrysum nudifolium</i> (L.) Less.                     | Asteraceae       | H   | Indigenous |
| <i>Helichrysum schimperii</i> (Sch. Bip. Ex A. Rich.) Moese. | Asteraceae       | C   | Indigenous |
| <i>Helichrysum splendidum</i> (Thunb.) Less.                 | Asteraceae       | H   | Indigenous |
| <i>Helichrysum stenopterum</i> DC.                           | Asteraceae       | H   | Indigenous |
| <i>Heteromorpha arborescens</i> (Spreng.) Cham. & Schltdl.   | Apiaceae         | S   | Indigenous |
| <i>Hibiscus macranthus</i> Hochst. ex A. Rich.               | Malvaceae        | S   | Indigenous |
| <i>Hyparrhenia hirta</i> (L.) Stapf                          | Poaceae          | H   | Indigenous |
| <i>Hyparrhenia rufa</i> (Nees) Stapf                         | Poaceae          | H   | Indigenous |
| <i>Hypericum peplidifolium</i> A. Rich.                      | Hypericaceae     | H   | Endemic    |
| <i>Hypericum quartinianum</i> A. Rich.                       | Hypericaceae     | S/T | Indigenous |
| <i>Hypericum revolutum</i> Vahl                              | Hypericaceae     | S/T | Indigenous |
| <i>Hypoestes forskoolii</i> (Vahl) R. Br.                    | Acanthaceae      | H   | Indigenous |
| <i>Hypoestes triflora</i> (Forssk.) Roem & Schult.           | Acanthaceae      | H   | Indigenous |
| <i>Impatiens rothii</i> Hook.f.                              | Balsaminaceae    | H   | Endemic    |
| <i>Inula confertiflora</i> A. Rich.                          | Asteraceae       | S   | Endemic    |
| <i>Inula mannii</i> (Hook. f.) Oliv. & Hiern                 | Asteraceae       | H   | Indigenous |
| <i>Ipomoea obscura</i> (L.) Ker-Gawl.                        | Convolvulaceae   | C   | Indigenous |
| <i>Ipomoea tenuirostris</i> Choisy                           | Convolvulaceae   | C   | Indigenous |
| <i>Ischaemum afrum</i> (J.F. Gmel.) Dandy                    | Poaceae          | H   | Indigenous |
| <i>Isodon schimperii</i> (Vatke) J.K Morton                  | Lamiaceae        | S   | Indigenous |
| <i>Jasminum abyssinicum</i> Hochets. Ex DC.                  | Oleaceae         | C   | Indigenous |
| <i>Jasminum grandiflorum</i> L.                              | Oleaceae         | C   | Indigenous |
| <i>Jasminum stans</i> Pax                                    | Oleaceae         | S   | Endemic    |
| <i>Juncus bufonius</i> L.                                    | Juncaceae        | H   | Indigenous |
| <i>Juncus oxycarpus</i> E. Meyer ex Kunth                    | Juncaceae        | H   | Indigenous |
| <i>Juniperus procera</i> Hochst. ex Endl                     | Cupressaceae     | T   | Indigenous |
| <i>Kalanchoe lanceolata</i> (Forssk.) Pers.                  | Crassulaceae     | H   | Endemic    |

|                                                                    |                |       |            |
|--------------------------------------------------------------------|----------------|-------|------------|
| <i>Kalanchoe marmorata</i> Bak.                                    | Crassulaceae   | H     | Indigenous |
| <i>Kalanchoe petitiiana</i> A. Rich.                               | Crassulaceae   | H     | Endemic    |
| <i>Kniphofia foliosa</i> Hochst.                                   | Asphodelaceae  | S     | Endemic    |
| <i>Kniphofia insignis</i> Rendle                                   | Asphodelaceae  | H     | Endemic    |
| <i>Kniphofia isoetifolia</i> Steud. ex Hochst.                     | Asphodelaceae  | H     | Endemic    |
| <i>Kniphofia pumila</i> (Ait.) Kunth                               | Asphodelaceae  | H     | Indigenous |
| <i>Lactuca inermis</i> Forssk.                                     | Asteraceae     | H     | Indigenous |
| <i>Lactuca seriola</i> L.                                          | Asteraceae     | H     | Indigenous |
| <i>Laggera alata</i> (D. Don) Sch. Bip. ex Oliv.                   | Asteraceae     | H     | Indigenous |
| <i>Laggera crispata</i> (Vahl) Hepper & Wood                       | Asteraceae     | H     | Indigenous |
| <i>Leonotis ocymifolia</i> (Burm. F.) Iwarsson                     | Lamiaceae      | S     | Indigenous |
| <i>Lepisorus excavatus</i> (Willd.) Ching                          | Polypodiaceae  | H     | Indigenous |
| <i>Leptadenia hastata</i> (Pers.) Decne.                           | Asclepiadaceae | S     | Indigenous |
| <i>Leucas abyssinica</i> (Benth.) Briq.                            | Lamiaceae      | S     | Endemic    |
| <i>Leucas glabrata</i> (Vahl) Sm.                                  | Lamiaceae      | S     | Indigenous |
| <i>Leucas martinicensis</i> (Jack.) R. Br.                         | Lamiaceae      | H     | Indigenous |
| <i>Linum trigynum</i> L.                                           | Linaceae       | H     | Indigenous |
| <i>Linum usitatissimum</i> L.                                      | Linaceae       | H     | Indigenous |
| <i>Lippia adoensis</i> Hochst. ex Walp.                            | Verbenaceae    | S     | Endemic    |
| <i>Lobelia giberroa</i> Hemsl.                                     | Lobeliaceae    | T     | Indigenous |
| <i>Lobelia rhynchopetalum</i> Hemsl.                               | Lobeliaceae    | T     | Endemic    |
| <i>Lobelia scebelii</i> Chiov.                                     | Lobeliaceae    | H     | Endemic    |
| <i>Loxogramme abyssinica</i> (Baker) M. G. Price                   | Polypodiaceae  | H     | Indigenous |
| <i>Lunathyrium boryanum</i> (Willd.) H. Ohba                       | Woodsiaceae    | H     | Indigenous |
| <i>Lythrum rotundifolium</i> A. Rich.                              | Lythraceae     | H     | Indigenous |
| <i>Maesa lanceolata</i> Forssk.                                    | Myrsinaceae    | S     | Indigenous |
| <i>Malva sylvestris</i> L.                                         | Malvaceae      | H     | NA         |
| <i>Malva verticillata</i> L.                                       | Malvaceae      | H     | Indigenous |
| <i>Maytenus addat</i> (Loes.) sebsebe                              | Celastraceae   | T     | Endemic    |
| <i>Maytenus arbutifolia</i> (A. Rich.) Wilczek                     | Celastraceae   | T/S   | Endemic    |
| <i>Maytenus senegalensis</i> (Lam.) Exell                          | Celastraceae   | T/S   | Indigenous |
| <i>Maytenus undata</i> (Thurb.) Blakelock                          | Celastraceae   | T     | Indigenous |
| <i>Microglossa pyrifolia</i> (Lam.) O. Kuntze                      | Asteraceae     | Liana | Indigenous |
| <i>Mikaniopsis clematoides</i> (Sch. Bip. ex A. Rich.) Milne-Redh. | Asteraceae     | Liana | Endemic    |
| <i>Momordica foetida</i> Schumach. Var. <i>Villosa</i> Cogn.       | Cucurbitaceae  | C     | Indigenous |
| <i>Myrica salicifolia</i> A. Rich.                                 | Myricaceae     | T     | Indigenous |
| <i>Myrsine africana</i> L.                                         | Myrsinaceae    | S     | Indigenous |
| <i>Myrsine melanophloeos</i> (L.) R. Br.                           | Myrsinaceae    | T     | Indigenous |
| <i>Nuxia congesta</i> R. Br. ex Fresen.                            | Loganiaceae    | T/S   | Indigenous |
| <i>Oenanthe palustris</i> (Chiov.) Norman                          | Apiaceae       | H     | Indigenous |
| <i>Oenanthe procumbens</i> (Wolff) Norman                          | Apiaceae       | H     | Indigenous |
| <i>Oldenlandia corymbosa</i> L.                                    | Rubiaceae      | H     | Indigenous |
| <i>Olea capensis</i> L.                                            | Oleaceae       | T     | Indigenous |
| <i>Olea europea</i> subsp. <i>Cuspidata</i> (Wall. Ex G. Don) Cif. | Oleaceae       | T     | Indigenous |
| <i>Olinia rochetiana</i> A. Juss.                                  | Oliniaceae     | T/S   | Indigenous |
| <i>Oplismenus hirtellus</i> (L.) P. Beauv.                         | Poaceae        | H     | Indigenous |
| <i>Oreoschimperella verrucosa</i> (A. Rich.) Rauschert             | Apiaceae       | H     | Indigenous |
| <i>Orobanche minor</i> Smit                                        | Orobanchaceae  | H     | Indigenous |
| <i>Osyris quadripartita</i> Decn.                                  | Santalaceae    | S     | Indigenous |
| <i>Otostegia tomentosa</i> subsp. <i>ambigens</i> (Chiov.) Sebald  | Lamiaceae      | S     | Indigenous |
| <i>Oxalis latifolia</i> Kunth                                      | Oxalidaceae    | H     | Introduced |
| <i>Oxalis procumbens</i> Steud. ex A. Rich.                        | Oxalidaceae    | H     | Indigenous |
| <i>Oxalis radicata</i> A. Rich.                                    | Oxalidaceae    | H     | Indigenous |
| <i>Oxygonum sinuatum</i> (Meisn.) Dammer                           | Polygonaceae   | H     | Indigenous |

|                                                               |                 |       |            |
|---------------------------------------------------------------|-----------------|-------|------------|
| <i>Panicum atrosanguineum</i> A. Rich.                        | Poaceae         | H     | Indigenous |
| <i>Panicum subalbidum</i> Kunth                               | Poaceae         | H     | Indigenous |
| <i>Parochaetus communis</i> D. Don                            | Fabaceae        | H     | Indigenous |
| <i>Pavonia urens</i> Cav.                                     | Malvaceae       | S     | Indigenous |
| <i>Pennisetum humile</i> Hochst. ex A. Rich.                  | Poaceae         | H     | Endemic    |
| <i>Pennisetum sphacelatum</i> (Nees) Th. Dur. & Schinz        | Poaceae         | H     | Indigenous |
| <i>Pennisetum thunbergii</i> Kunth                            | Poaceae         | H     | Indigenous |
| <i>Pennisetum villosum</i> Fresen.                            | Poaceae         | H     | Indigenous |
| <i>Pentarrhium insipidum</i> E. Mey.                          | Asclepiadaceae  | C     | Indigenous |
| <i>Pentas schimperiana</i> (A. Rich.) Vatke                   | Rubiaceae       | S     | Indigenous |
| <i>Peperomia abyssinica</i> Miq.                              | Piperaceae      | H     | Indigenous |
| <i>Periploca linearifolia</i> Quart. - Dill. & A. Rich.       | Asclepiadaceae  | Liana | Indigenous |
| <i>Persicaria setosula</i> (A. Rich.) K. L. Wilson            | Polygonaceae    | H     | Indigenous |
| <i>Phagnalon abyssinicum</i> Sch. Bip. ex A. Rich.            | Asteraceae      | H     | Endemic    |
| <i>Phragmanthera regularis</i> (Sprague) M. Gilbert           | Loranthaceae    | S     | Indigenous |
| <i>Physalis peruviana</i> L.                                  | Solanaceae      | H     | Indigenous |
| <i>Phytolacca dodecandra</i> L Herit.                         | Phytolaccaceae  | S     | Indigenous |
| <i>Pilea tetraphylla</i> (Steudel) Blume                      | Urticaceae      | H     | Indigenous |
| <i>Pimpinella hirtella</i> (Hochst.) A. Rich.                 | Apiaceae        | H     | Indigenous |
| <i>Pimpinella oreophila</i> Hook. f.                          | Apiaceae        | H     | Indigenous |
| <i>Pimpinella pimpinelloides</i> (Hochst.) Wolff              | Apiaceae        | H     | Indigenous |
| <i>Pittosporum viridiflorum</i> Sims                          | Pittosporaceae  | T     | Indigenous |
| <i>Plantago africana</i> Verdc.                               | Plantaginaceae  | H     | Indigenous |
| <i>Plantago lanceolata</i> L.                                 | Plantaginaceae  | H     | Indigenous |
| <i>Plantago major</i> L.                                      | Plantaginaceae  | H     | Indigenous |
| <i>Plectocephalus varians</i> (A. Rich.) C. Jeffrey ex Cufod. | Asteraceae      | H     | Endemic    |
| <i>Plectranthus alpinus</i> (Vatke) Ryding                    | Lamiaceae       | H     | Indigenous |
| <i>Plectranthus lanuginosus</i> (Hochst. ex Benth.) Agnew     | Lamiaceae       | H     | Indigenous |
| <i>Pleopeltis macrocarpa</i> (Willd.) Kaulf                   | Polypodiaceae   | H     | Indigenous |
| <i>Podocarpus falcatus</i> (Thunb.) R. B. ex. Mirb.           | Podocarpaceae   | T     | Indigenous |
| <i>Polypogon fugax</i> Nees ex Steud.                         | Poaceae         | H     | Introduced |
| <i>Polystichum wilsonii</i> H. Christ                         | Dryopteridaceae | H     | Indigenous |
| <i>Prunus africana</i> (Hook. f.) Kalkm.                      | Rosaceae        | T     | Indigenous |
| <i>Pteris cretica</i> L.                                      | Pteridaceae     | H     | Indigenous |
| <i>Pteris vittata</i> L.                                      | Pteridaceae     | H     | Indigenous |
| <i>Pterocephalus frutescens</i> Hochst. ex A. Rich.           | Dipsacaceae     | H     | Indigenous |
| <i>Pterolobium stellatum</i> (Forssk.) Brenan                 | Fabaceae        | S     | Indigenous |
| <i>Pycnostachys abyssinica</i> Fresen.                        | Lamiaceae       | S     | Endemic    |
| <i>Pycnostachys eminii</i> Gurke                              | Lamiaceae       | S     | Indigenous |
| <i>Ranunculus oligocarpus</i> Hochst. ex A. Rich.             | Ranunculaceae   | H     | Indigenous |
| <i>Rhamnus prinoides</i> L'Herit.                             | Rhamnaceae      | S     | Indigenous |
| <i>Rhamnus staddo</i> A. Rich.                                | Rhamnaceae      | S     | Indigenous |
| <i>Rhus glutinosa</i> A. Rich.                                | Anacardiaceae   | S     | Endemic    |
| <i>Rhus natalensis</i> Krauss                                 | Anacardiaceae   | S     | Indigenous |
| <i>Rhus vulgaris</i> Meikle                                   | Anacardiaceae   | S     | Indigenous |
| <i>Rhynchosia minima</i> var. <i>prostrata</i> (Harv.) Meikle | Fabaceae        | S     | Indigenous |
| <i>Rosa abyssinica</i> Lindley                                | Rosaceae        | S     | Indigenous |
| <i>Rubia cordifolia</i> L.                                    | Rubiaceae       | H     | Indigenous |
| <i>Rubus erlangeri</i> Engl.                                  | Rosaceae        | S     | Endemic    |
| <i>Rubus steudneri</i> Schweinf.                              | Rosaceae        | S     | Indigenous |
| <i>Rumex abyssinicus</i> Jacq.                                | Polygonaceae    | H     | Indigenous |
| <i>Rumex nepalensis</i> Spreng.                               | Polygonaceae    | H     | Indigenous |
| <i>Rumex nervosus</i> Vahl                                    | Polygonaceae    | H     | Indigenous |
| <i>Ruta chalepensis</i> L.                                    | Rutaceae        | H     | Indigenous |

|                                                            |                  |   |            |
|------------------------------------------------------------|------------------|---|------------|
| <i>Rytiginia neglecta</i> (Hiern) Robyns                   | Rubiaceae        | S | Indigenous |
| <i>Salix subserrata</i> Willd.                             | Salicaceae       | S | Indigenous |
| <i>Salvia merjamie</i> Forssk.                             | Lamiaceae        | H | Indigenous |
| <i>Salvia nilotica</i> Jacq.                               | Lamiaceae        | H | Indigenous |
| <i>Satureja abyssinica</i> (Benth.) Briq.                  | Lamiaceae        | H | Indigenous |
| <i>Satureja paradoxa</i> (Vatke) Engl. ex Seybold          | Lamiaceae        | H | Endemic    |
| <i>Satureja punctata</i> (Benth.) Briq.                    | Lamiaceae        | H | Indigenous |
| <i>Satureja simensis</i> (Benth.) Briq.                    | Lamiaceae        | H | Indigenous |
| <i>Scabiosa columbaria</i> L.                              | Dipsacaceae      | H | Indigenous |
| <i>Schefflera abyssinica</i> (Hochst. Ex A. Rich.) Harms   | Araliaceae       | T | Indigenous |
| <i>Schoenoplectus maritimus</i> (L.) Lye                   | Cyperaceae       | H | Indigenous |
| <i>Selaginella kraussiana</i> (kunze) A. Braun             | Selaginellaceae  | H | Indigenous |
| <i>Senecio hadiensis</i> Forssk.                           | Asteraceae       | C | Indigenous |
| <i>Senecio lyratus</i> Forssk.                             | Asteraceae       | H | Indigenous |
| <i>Senecio myriocephalus</i> Sch. Bip. ex A. Rich.         | Asteraceae       | S | Endemic    |
| <i>Senecio ochrocarpus</i> Oliv. & Hiern                   | Asteraceae       | H | Endemic    |
| <i>Senecio subsessilis</i> Oliv. & Hiern                   | Asteraceae       | H | Indigenous |
| <i>Sida schimperiana</i> Hochst. ex A. Rich.               | Malvaceae        | H | Indigenous |
| <i>Silybum marianum</i> (L.) Gaertn                        | Asteraceae       | H | Introduced |
| <i>Smilax anceps</i> Willd.                                | Smilacaceae      | C | Indigenous |
| <i>Smilax aspera</i> L.                                    | Smilacaceae      | C | Indigenous |
| <i>Snowdenia polystachya</i> (Fresen.) Pilg.               | Poaceae          | H | Indigenous |
| <i>Solanecio angulatus</i> (Vahl) C. Jeffrey               | Asteraceae       | C | Indigenous |
| <i>Solanum adoense</i> Hochst. ex A. Rich.                 | Solanaceae       | H | Indigenous |
| <i>Solanum anguivi</i> Lam.                                | Solanaceae       | H | Indigenous |
| <i>Solanum incanum</i> L.                                  | Solanaceae       | S | Indigenous |
| <i>Solanum marginatum</i> L. f.                            | Solanaceae       | S | Endemic    |
| <i>Solanum nigrum</i> L.                                   | Solanaceae       | H | Indigenous |
| <i>Sparmannia macrocarpa</i> Ulbr.                         | Tiliaceae        | S | Endemic    |
| <i>Sparmannia ricinocarpa</i> (Eckl. & Zeyl.) O. Ktze.     | Tiliaceae        | S | Indigenous |
| <i>Sporobolus africanus</i> (Poir.) Robyns & Tournay       | Poaceae          | H | Indigenous |
| <i>Sporobolus pyramidalis</i> P. Beauv.                    | Poaceae          | H | Indigenous |
| <i>Stachys aculeolata</i> Hook. F.                         | Lamiaceae        | H | Indigenous |
| <i>Stephania abyssinica</i> (Dillon & A. Rich.) Walp.      | Menispermaceae   | C | Indigenous |
| <i>Swertia abyssinica</i> Hochst.                          | Gentianaceae     | H | Indigenous |
| <i>Swertia kilimandscharica</i> Engl.                      | Gentianaceae     | H | Indigenous |
| <i>Swertia lugardae</i> Bullock                            | Gentianaceae     | H | Indigenous |
| <i>Tagetes minuta</i> L.                                   | Asteraceae       | H | Introduced |
| <i>Thalictrum rhynchocarpum</i> Dill. & A. Rich.           | Ranunculaceae    | H | Indigenous |
| <i>Thymus schimperi</i> Ronniger                           | Lamiaceae        | H | Endemic    |
| <i>Toddalia asiatica</i> (L.) Lam.                         | Rutaceae         | C | Indigenous |
| <i>Trachyspermum ammi</i> (L.) Sprague ex Turrill          | Apiaceae         | H | Indigenous |
| <i>Trifolium burchellianum</i> ser.                        | Fabaceae         | H | Indigenous |
| <i>Trifolium campestre</i> Schreb.                         | Fabaceae         | H | Indigenous |
| <i>Trifolium rueppellianum</i> Fresen.                     | Fabaceae         | H | Indigenous |
| <i>Trifolium semipilosum</i> Var. <i>internedum</i> Thulin | Fabaceae         | H | Indigenous |
| <i>Trifolium simense</i> Fresen.                           | Fabaceae         | H | Indigenous |
| <i>Urera hypselodendron</i> (A. Rich.) Wedd.               | Urticaceae       | C | Indigenous |
| <i>Urtica dioica</i> L.                                    | Urticaceae       | H | Indigenous |
| <i>Urtica simensis</i> Steudel                             | Urticaceae       | H | Endemic    |
| <i>Verbascum sinaiticum</i> Benth.                         | Scrophulariaceae | H | Indigenous |
| <i>Vernonia amygdalina</i> Del.                            | Asteraceae       | S | Indigenous |
| <i>Vernonia hymenolepis</i> A. Rich.                       | Asteraceae       | S | Indigenous |
| <i>Vernonia myriantha</i> Hook. F.                         | Asteraceae       | S | Indigenous |

|                                                 |                  |   |            |
|-------------------------------------------------|------------------|---|------------|
| <i>Vernonia urticifolia</i> A. Rich.            | Asteraceae       | S | Indigenous |
| <i>Vernonia wollastonii</i> S. Moore            | Asteraceae       | S | Indigenous |
| <i>Veronica abyssinica</i> Fres.                | Scrophulariaceae | H | Indigenous |
| <i>Veronica glandulosa</i> Hochst. ex Benth.    | Scrophulariaceae | H | Indigenous |
| <i>Vicia sativa</i> Var. <i>angustifolia</i> L. | Fabaceae         | H | Indigenous |
| <i>Zehneria scabra</i> (Linn. f.) Sond.         | Cucurbitaceae    | C | Indigenous |
